# Supplementary material for: Natural wind variability triggered drop in German redispatch volume and costs from 2015 to 2016
Source: PLoS One. 2018 Jan 12;13(1):e0190707. doi: 10.1371/journal.pone.0190707 (PMC5766128; doi:10.1371/journal.pone.0190707)
Supplement: S2 File — (CSV) [file pone.0190707.s002.csv]

1979-01-01 00:00:00	13953.3723661
1979-01-01 06:00:00	11662.7342714
1979-01-01 12:00:00	16950.1452103
1979-01-01 18:00:00	3517.75237225
1979-01-02 00:00:00	6097.79298041
1979-01-02 06:00:00	8582.13789753
1979-01-02 12:00:00	9580.46775623
1979-01-02 18:00:00	5534.7210146
1979-01-03 00:00:00	7200.70477027
1979-01-03 06:00:00	7537.64318379
1979-01-03 12:00:00	13175.8979462
1979-01-03 18:00:00	6848.85965291
1979-01-04 00:00:00	3729.96708312
1979-01-04 06:00:00	2589.01042133
1979-01-04 12:00:00	5580.54433919
1979-01-04 18:00:00	4893.67744702
1979-01-05 00:00:00	2622.4903604
1979-01-05 06:00:00	1372.77290221
1979-01-05 12:00:00	747.221469246
1979-01-05 18:00:00	411.906687108
1979-01-06 00:00:00	1132.32079077
1979-01-06 06:00:00	2493.28236948
1979-01-06 12:00:00	3585.88347237
1979-01-06 18:00:00	4526.44208858
1979-01-07 00:00:00	8012.32061918
1979-01-07 06:00:00	15077.6699664
1979-01-07 12:00:00	23971.2693997
1979-01-07 18:00:00	22351.9935132
1979-01-08 00:00:00	14469.6173892
1979-01-08 06:00:00	4939.80550746
1979-01-08 12:00:00	6774.32849396
1979-01-08 18:00:00	5206.13325741
1979-01-09 00:00:00	2420.8356942
1979-01-09 06:00:00	1335.66825138
1979-01-09 12:00:00	2334.30650331
1979-01-09 18:00:00	2715.32078274
1979-01-10 00:00:00	8838.22841772
1979-01-10 06:00:00	9120.77881002
1979-01-10 12:00:00	27918.4422359
1979-01-10 18:00:00	34961.9921666
1979-01-11 00:00:00	18347.5442943
1979-01-11 06:00:00	12451.0844206
1979-01-11 12:00:00	13676.2868413
1979-01-11 18:00:00	4663.0624968
1979-01-12 00:00:00	7227.30467603
1979-01-12 06:00:00	8929.19881488
1979-01-12 12:00:00	14310.3663231
1979-01-12 18:00:00	13813.6544439
1979-01-13 00:00:00	14052.2244316
1979-01-13 06:00:00	12034.1881116
1979-01-13 12:00:00	22644.9647484
1979-01-13 18:00:00	10720.3422091
1979-01-14 00:00:00	10229.6756492
1979-01-14 06:00:00	7821.31664629
1979-01-14 12:00:00	13995.9046156
1979-01-14 18:00:00	4194.98510896
1979-01-15 00:00:00	2550.86359454
1979-01-15 06:00:00	1877.14814039
1979-01-15 12:00:00	5368.93299007
1979-01-15 18:00:00	2063.39417265
1979-01-16 00:00:00	1956.00684694
1979-01-16 06:00:00	911.189639803
1979-01-16 12:00:00	1546.9423209
1979-01-16 18:00:00	1986.9951813
1979-01-17 00:00:00	1671.7594198
1979-01-17 06:00:00	488.114086445
1979-01-17 12:00:00	600.561960889
1979-01-17 18:00:00	3034.07293551
1979-01-18 00:00:00	3228.06593101
1979-01-18 06:00:00	4600.31025922
1979-01-18 12:00:00	9270.82143563
1979-01-18 18:00:00	12718.1317513
1979-01-19 00:00:00	14869.9813094
1979-01-19 06:00:00	16853.8279367
1979-01-19 12:00:00	19718.7348708
1979-01-19 18:00:00	14414.5907615
1979-01-20 00:00:00	11117.4338082
1979-01-20 06:00:00	12144.0230024
1979-01-20 12:00:00	11980.3984005
1979-01-20 18:00:00	10240.3887455
1979-01-21 00:00:00	7097.04194049
1979-01-21 06:00:00	6554.73167002
1979-01-21 12:00:00	5704.6708354
1979-01-21 18:00:00	4019.54036563
1979-01-22 00:00:00	1726.78119238
1979-01-22 06:00:00	1010.31636081
1979-01-22 12:00:00	519.058824866
1979-01-22 18:00:00	1377.03021882
1979-01-23 00:00:00	818.376349295
1979-01-23 06:00:00	3832.39260982
1979-01-23 12:00:00	3736.93336211
1979-01-23 18:00:00	5713.00822536
1979-01-24 00:00:00	7671.11218166
1979-01-24 06:00:00	9817.25154839
1979-01-24 12:00:00	16077.9223346
1979-01-24 18:00:00	2084.21889645
1979-01-25 00:00:00	6265.77052012
1979-01-25 06:00:00	11758.1851706
1979-01-25 12:00:00	18800.4431102
1979-01-25 18:00:00	6443.35582831
1979-01-26 00:00:00	10609.0247165
1979-01-26 06:00:00	15473.9242855
1979-01-26 12:00:00	22159.5430006
1979-01-26 18:00:00	4641.60319076
1979-01-27 00:00:00	1738.19927717
1979-01-27 06:00:00	2320.15756648
1979-01-27 12:00:00	5835.13216929
1979-01-27 18:00:00	1824.07973201
1979-01-28 00:00:00	871.179055861
1979-01-28 06:00:00	339.777386439
1979-01-28 12:00:00	586.932523125
1979-01-28 18:00:00	1027.68833212
1979-01-29 00:00:00	3249.10378564
1979-01-29 06:00:00	5212.47852914
1979-01-29 12:00:00	11146.2461819
1979-01-29 18:00:00	4626.7372779
1979-01-30 00:00:00	3506.38471036
1979-01-30 06:00:00	1932.0397463
1979-01-30 12:00:00	1636.64847696
1979-01-30 18:00:00	788.53480586
1979-01-31 00:00:00	222.49127355
1979-01-31 06:00:00	3344.44063676
1979-01-31 12:00:00	18116.4700911
1979-01-31 18:00:00	15140.5895137
1979-02-01 00:00:00	23382.5161604
1979-02-01 06:00:00	15478.2315431
1979-02-01 12:00:00	17288.8825054
1979-02-01 18:00:00	13983.3922623
1979-02-02 00:00:00	14377.6379334
1979-02-02 06:00:00	12729.8550097
1979-02-02 12:00:00	11022.5294058
1979-02-02 18:00:00	4113.83788924
1979-02-03 00:00:00	4804.65352999
1979-02-03 06:00:00	15356.2149642
1979-02-03 12:00:00	30942.3966605
1979-02-03 18:00:00	26803.3267084
1979-02-04 00:00:00	14512.8677078
1979-02-04 06:00:00	6269.41440857
1979-02-04 12:00:00	3500.24470707
1979-02-04 18:00:00	229.068964882
1979-02-05 00:00:00	81.2239284848
1979-02-05 06:00:00	69.1101761305
1979-02-05 12:00:00	182.432469018
1979-02-05 18:00:00	637.927296803
1979-02-06 00:00:00	320.59161693
1979-02-06 06:00:00	391.690133443
1979-02-06 12:00:00	244.790073474
1979-02-06 18:00:00	17.2673017166
1979-02-07 00:00:00	1603.04146584
1979-02-07 06:00:00	6552.34544364
1979-02-07 12:00:00	14038.1746412
1979-02-07 18:00:00	5171.08330256
1979-02-08 00:00:00	4715.98548389
1979-02-08 06:00:00	12624.5841609
1979-02-08 12:00:00	39518.126249
1979-02-08 18:00:00	13080.733583
1979-02-09 00:00:00	1992.07456143
1979-02-09 06:00:00	2680.24539634
1979-02-09 12:00:00	3183.48069466
1979-02-09 18:00:00	991.353919039
1979-02-10 00:00:00	203.894572219
1979-02-10 06:00:00	1465.80486085
1979-02-10 12:00:00	5069.56139897
1979-02-10 18:00:00	2242.01898521
1979-02-11 00:00:00	2573.76684545
1979-02-11 06:00:00	6431.47169937
1979-02-11 12:00:00	23159.9669679
1979-02-11 18:00:00	28934.4179599
1979-02-12 00:00:00	33542.7762316
1979-02-12 06:00:00	26970.1624243
1979-02-12 12:00:00	18272.5888864
1979-02-12 18:00:00	7466.66425021
1979-02-13 00:00:00	5568.80399923
1979-02-13 06:00:00	6661.90044739
1979-02-13 12:00:00	13845.4140279
1979-02-13 18:00:00	15142.3552507
1979-02-14 00:00:00	23411.109059
1979-02-14 06:00:00	27441.4099255
1979-02-14 12:00:00	28600.3784303
1979-02-14 18:00:00	26465.9005822
1979-02-15 00:00:00	25866.0102598
1979-02-15 06:00:00	26281.4752826
1979-02-15 12:00:00	24197.2022302
1979-02-15 18:00:00	25300.4213284
1979-02-16 00:00:00	20325.5457185
1979-02-16 06:00:00	17323.7278067
1979-02-16 12:00:00	24063.3379905
1979-02-16 18:00:00	18814.3215335
1979-02-17 00:00:00	19798.0687714
1979-02-17 06:00:00	23821.3882218
1979-02-17 12:00:00	26625.4055395
1979-02-17 18:00:00	15218.1976972
1979-02-18 00:00:00	8600.22306043
1979-02-18 06:00:00	3453.27027108
1979-02-18 12:00:00	3425.2026617
1979-02-18 18:00:00	1028.49077207
1979-02-19 00:00:00	221.378800243
1979-02-19 06:00:00	102.601456009
1979-02-19 12:00:00	161.344469247
1979-02-19 18:00:00	210.373250281
1979-02-20 00:00:00	61.8342903489
1979-02-20 06:00:00	137.894681886
1979-02-20 12:00:00	341.380819352
1979-02-20 18:00:00	505.847897394
1979-02-21 00:00:00	531.94666263
1979-02-21 06:00:00	746.036893095
1979-02-21 12:00:00	976.423832174
1979-02-21 18:00:00	544.252744711
1979-02-22 00:00:00	168.901365714
1979-02-22 06:00:00	8.16398946185
1979-02-22 12:00:00	30.5548592073
1979-02-22 18:00:00	68.2094333376
1979-02-23 00:00:00	709.266106945
1979-02-23 06:00:00	1558.32475035
1979-02-23 12:00:00	1502.64002073
1979-02-23 18:00:00	820.434658878
1979-02-24 00:00:00	2529.67186773
1979-02-24 06:00:00	2452.89936749
1979-02-24 12:00:00	2539.89657705
1979-02-24 18:00:00	441.178695694
1979-02-25 00:00:00	135.906002203
1979-02-25 06:00:00	82.0386162761
1979-02-25 12:00:00	517.320837143
1979-02-25 18:00:00	560.007662937
1979-02-26 00:00:00	1517.9078185
1979-02-26 06:00:00	3808.07669973
1979-02-26 12:00:00	6762.50395623
1979-02-26 18:00:00	3956.70510535
1979-02-27 00:00:00	4412.708073
1979-02-27 06:00:00	5281.17298241
1979-02-27 12:00:00	8207.61292265
1979-02-27 18:00:00	3857.96161477
1979-02-28 00:00:00	4071.53074016
1979-02-28 06:00:00	4241.24023773
1979-02-28 12:00:00	7676.8244454
1979-02-28 18:00:00	7282.52492428
1979-03-01 00:00:00	4908.88164679
1979-03-01 06:00:00	5120.99858532
1979-03-01 12:00:00	25299.5309307
1979-03-01 18:00:00	5785.71210383
1979-03-02 00:00:00	7363.70396496
1979-03-02 06:00:00	15930.5271128
1979-03-02 12:00:00	38262.2364247
1979-03-02 18:00:00	20630.5996937
1979-03-03 00:00:00	18040.4773092
1979-03-03 06:00:00	20202.6939348
1979-03-03 12:00:00	28612.2442026
1979-03-03 18:00:00	15091.5339699
1979-03-04 00:00:00	9110.75854695
1979-03-04 06:00:00	8319.99169273
1979-03-04 12:00:00	14312.1792242
1979-03-04 18:00:00	4346.41794807
1979-03-05 00:00:00	4051.54059949
1979-03-05 06:00:00	4128.44421266
1979-03-05 12:00:00	7593.53220382
1979-03-05 18:00:00	4158.67587172
1979-03-06 00:00:00	3911.81719092
1979-03-06 06:00:00	3473.50724066
1979-03-06 12:00:00	5358.95455542
1979-03-06 18:00:00	5202.62842592
1979-03-07 00:00:00	11494.6898678
1979-03-07 06:00:00	21343.6256973
1979-03-07 12:00:00	27026.3131552
1979-03-07 18:00:00	4132.10298768
1979-03-08 00:00:00	3096.81206011
1979-03-08 06:00:00	1569.72742057
1979-03-08 12:00:00	8889.33827425
1979-03-08 18:00:00	4027.24097849
1979-03-09 00:00:00	12728.0072324
1979-03-09 06:00:00	27438.7849749
1979-03-09 12:00:00	45546.0468701
1979-03-09 18:00:00	40955.7814897
1979-03-10 00:00:00	25993.9241834
1979-03-10 06:00:00	22306.2613692
1979-03-10 12:00:00	40609.9271338
1979-03-10 18:00:00	4167.11885357
1979-03-11 00:00:00	1900.2013745
1979-03-11 06:00:00	5028.58315489
1979-03-11 12:00:00	10374.9132049
1979-03-11 18:00:00	8188.81416617
1979-03-12 00:00:00	12981.6693325
1979-03-12 06:00:00	13174.445738
1979-03-12 12:00:00	30437.1304047
1979-03-12 18:00:00	22104.9650597
1979-03-13 00:00:00	29582.8428447
1979-03-13 06:00:00	25126.6047372
1979-03-13 12:00:00	23753.01627
1979-03-13 18:00:00	116.416892271
1979-03-14 00:00:00	174.117151149
1979-03-14 06:00:00	538.15943701
1979-03-14 12:00:00	1999.01726739
1979-03-14 18:00:00	3524.20787642
1979-03-15 00:00:00	10195.8052862
1979-03-15 06:00:00	17893.4143464
1979-03-15 12:00:00	27610.877468
1979-03-15 18:00:00	22356.509027
1979-03-16 00:00:00	15123.1559625
1979-03-16 06:00:00	14261.6218968
1979-03-16 12:00:00	10981.8646197
1979-03-16 18:00:00	6639.06700372
1979-03-17 00:00:00	7302.40523307
1979-03-17 06:00:00	6030.21274215
1979-03-17 12:00:00	11883.8040237
1979-03-17 18:00:00	4298.436611
1979-03-18 00:00:00	4132.12094994
1979-03-18 06:00:00	3936.42149639
1979-03-18 12:00:00	4443.86105773
1979-03-18 18:00:00	2767.72153934
1979-03-19 00:00:00	3484.97803009
1979-03-19 06:00:00	786.135228596
1979-03-19 12:00:00	96.0607673125
1979-03-19 18:00:00	0.00380114110541
1979-03-20 00:00:00	205.604850674
1979-03-20 06:00:00	585.209221033
1979-03-20 12:00:00	1300.98277246
1979-03-20 18:00:00	942.324665635
1979-03-21 00:00:00	1039.20540596
1979-03-21 06:00:00	2246.69970105
1979-03-21 12:00:00	16646.0112713
1979-03-21 18:00:00	6178.88541403
1979-03-22 00:00:00	7849.43539579
1979-03-22 06:00:00	16458.2229077
1979-03-22 12:00:00	28874.8071045
1979-03-22 18:00:00	5647.69960642
1979-03-23 00:00:00	10296.0609021
1979-03-23 06:00:00	6904.9085725
1979-03-23 12:00:00	23108.8921452
1979-03-23 18:00:00	6669.61858306
1979-03-24 00:00:00	4880.70575268
1979-03-24 06:00:00	3317.01879203
1979-03-24 12:00:00	3035.704575
1979-03-24 18:00:00	273.671629311
1979-03-25 00:00:00	5849.89118247
1979-03-25 06:00:00	21354.9158954
1979-03-25 12:00:00	36880.8537647
1979-03-25 18:00:00	17440.3571549
1979-03-26 00:00:00	12668.5590675
1979-03-26 06:00:00	17018.6833222
1979-03-26 12:00:00	31564.8415332
1979-03-26 18:00:00	19624.3697526
1979-03-27 00:00:00	16818.7870205
1979-03-27 06:00:00	22145.2268485
1979-03-27 12:00:00	41956.9904557
1979-03-27 18:00:00	14890.3327587
1979-03-28 00:00:00	11780.5695195
1979-03-28 06:00:00	19230.4783989
1979-03-28 12:00:00	24289.5024761
1979-03-28 18:00:00	2801.1912309
1979-03-29 00:00:00	891.19626454
1979-03-29 06:00:00	1870.12569994
1979-03-29 12:00:00	8004.15252797
1979-03-29 18:00:00	11980.4950495
1979-03-30 00:00:00	14700.8978355
1979-03-30 06:00:00	16758.2559028
1979-03-30 12:00:00	23383.4606346
1979-03-30 18:00:00	10478.7814519
1979-03-31 00:00:00	5629.06837004
1979-03-31 06:00:00	4876.59241257
1979-03-31 12:00:00	6693.01940716
1979-03-31 18:00:00	376.590777835
1979-04-01 00:00:00	544.705899109
1979-04-01 06:00:00	1935.68829911
1979-04-01 12:00:00	7478.95914954
1979-04-01 18:00:00	267.492759183
1979-04-02 00:00:00	408.246342302
1979-04-02 06:00:00	1639.80452511
1979-04-02 12:00:00	7691.71886866
1979-04-02 18:00:00	371.395320346
1979-04-03 00:00:00	2559.26982628
1979-04-03 06:00:00	2893.11994385
1979-04-03 12:00:00	4734.20596819
1979-04-03 18:00:00	327.769454442
1979-04-04 00:00:00	247.918550874
1979-04-04 06:00:00	435.950974365
1979-04-04 12:00:00	484.28568107
1979-04-04 18:00:00	907.228033289
1979-04-05 00:00:00	865.40057536
1979-04-05 06:00:00	1267.90954314
1979-04-05 12:00:00	2711.97335559
1979-04-05 18:00:00	2901.31503458
1979-04-06 00:00:00	1140.6221122
1979-04-06 06:00:00	1953.86496329
1979-04-06 12:00:00	1236.29712118
1979-04-06 18:00:00	838.350729328
1979-04-07 00:00:00	1678.94279933
1979-04-07 06:00:00	2606.22346222
1979-04-07 12:00:00	7776.54171185
1979-04-07 18:00:00	2603.25881918
1979-04-08 00:00:00	1811.33245699
1979-04-08 06:00:00	2734.45718574
1979-04-08 12:00:00	3536.10848449
1979-04-08 18:00:00	1318.24389022
1979-04-09 00:00:00	2124.37128827
1979-04-09 06:00:00	3492.80705122
1979-04-09 12:00:00	14324.4605531
1979-04-09 18:00:00	7292.13394585
1979-04-10 00:00:00	7914.74079527
1979-04-10 06:00:00	9239.08172494
1979-04-10 12:00:00	15019.7797641
1979-04-10 18:00:00	9801.77878257
1979-04-11 00:00:00	12586.882362
1979-04-11 06:00:00	13122.1211468
1979-04-11 12:00:00	26757.0906459
1979-04-11 18:00:00	15251.4180217
1979-04-12 00:00:00	11169.328329
1979-04-12 06:00:00	5220.2386555
1979-04-12 12:00:00	2051.2585268
1979-04-12 18:00:00	102.298818655
1979-04-13 00:00:00	944.881958685
1979-04-13 06:00:00	1070.21300847
1979-04-13 12:00:00	3546.09840398
1979-04-13 18:00:00	173.789133528
1979-04-14 00:00:00	77.4201891553
1979-04-14 06:00:00	5.27173044433
1979-04-14 12:00:00	225.514552263
1979-04-14 18:00:00	31.5236802502
1979-04-15 00:00:00	62.4737783702
1979-04-15 06:00:00	99.8828738323
1979-04-15 12:00:00	133.298105977
1979-04-15 18:00:00	192.324169594
1979-04-16 00:00:00	507.667079709
1979-04-16 06:00:00	4729.07603155
1979-04-16 12:00:00	7589.90000696
1979-04-16 18:00:00	6432.05737081
1979-04-17 00:00:00	5228.57001126
1979-04-17 06:00:00	4933.65936097
1979-04-17 12:00:00	7600.9902463
1979-04-17 18:00:00	3665.18723722
1979-04-18 00:00:00	1371.9444669
1979-04-18 06:00:00	674.348026521
1979-04-18 12:00:00	575.362360889
1979-04-18 18:00:00	99.9667273759
1979-04-19 00:00:00	17.6795018009
1979-04-19 06:00:00	133.071248848
1979-04-19 12:00:00	619.788872663
1979-04-19 18:00:00	564.503762691
1979-04-20 00:00:00	850.916631709
1979-04-20 06:00:00	856.09477806
1979-04-20 12:00:00	3264.16870335
1979-04-20 18:00:00	273.313609519
1979-04-21 00:00:00	1513.84424184
1979-04-21 06:00:00	646.092248067
1979-04-21 12:00:00	2974.48666304
1979-04-21 18:00:00	1302.36460183
1979-04-22 00:00:00	1067.24906051
1979-04-22 06:00:00	3129.6929451
1979-04-22 12:00:00	8939.85887859
1979-04-22 18:00:00	1196.04567117
1979-04-23 00:00:00	2850.6754368
1979-04-23 06:00:00	12683.0271608
1979-04-23 12:00:00	18204.8607044
1979-04-23 18:00:00	1785.04282879
1979-04-24 00:00:00	4057.12822511
1979-04-24 06:00:00	2970.81669214
1979-04-24 12:00:00	7221.91549442
1979-04-24 18:00:00	1332.13155908
1979-04-25 00:00:00	2491.52770296
1979-04-25 06:00:00	4905.59284359
1979-04-25 12:00:00	4224.04448411
1979-04-25 18:00:00	37.2785184324
1979-04-26 00:00:00	44.6641650518
1979-04-26 06:00:00	136.801174986
1979-04-26 12:00:00	312.816844109
1979-04-26 18:00:00	641.907824478
1979-04-27 00:00:00	815.249930512
1979-04-27 06:00:00	2352.60340876
1979-04-27 12:00:00	5735.8985689
1979-04-27 18:00:00	5857.2184456
1979-04-28 00:00:00	1950.71948629
1979-04-28 06:00:00	4383.64081956
1979-04-28 12:00:00	3602.99939322
1979-04-28 18:00:00	155.085912685
1979-04-29 00:00:00	258.550835239
1979-04-29 06:00:00	2394.47866356
1979-04-29 12:00:00	15281.6366032
1979-04-29 18:00:00	13928.1460318
1979-04-30 00:00:00	33239.0283412
1979-04-30 06:00:00	46618.6269142
1979-04-30 12:00:00	39133.6086794
1979-04-30 18:00:00	23105.40297
1979-05-01 00:00:00	10823.3739613
1979-05-01 06:00:00	7819.86260249
1979-05-01 12:00:00	9469.46194661
1979-05-01 18:00:00	723.967779185
1979-05-02 00:00:00	9829.13053896
1979-05-02 06:00:00	28410.5725206
1979-05-02 12:00:00	37275.6693148
1979-05-02 18:00:00	17426.0616664
1979-05-03 00:00:00	9086.59877098
1979-05-03 06:00:00	9065.02085995
1979-05-03 12:00:00	11241.215255
1979-05-03 18:00:00	915.45780068
1979-05-04 00:00:00	127.145808738
1979-05-04 06:00:00	376.063291344
1979-05-04 12:00:00	696.757539153
1979-05-04 18:00:00	321.52187737
1979-05-05 00:00:00	49.1234942436
1979-05-05 06:00:00	155.071837271
1979-05-05 12:00:00	179.46574268
1979-05-05 18:00:00	5.45981466822
1979-05-06 00:00:00	0.137234577619
1979-05-06 06:00:00	8.7581510208
1979-05-06 12:00:00	85.950086814
1979-05-06 18:00:00	74.6215123086
1979-05-07 00:00:00	41.9803707952
1979-05-07 06:00:00	994.076657106
1979-05-07 12:00:00	6556.25342442
1979-05-07 18:00:00	4927.43012387
1979-05-08 00:00:00	4060.34605205
1979-05-08 06:00:00	4747.55509502
1979-05-08 12:00:00	5215.73908474
1979-05-08 18:00:00	544.547518924
1979-05-09 00:00:00	41.4822877281
1979-05-09 06:00:00	145.982257908
1979-05-09 12:00:00	316.82903727
1979-05-09 18:00:00	2232.96333261
1979-05-10 00:00:00	2688.80587981
1979-05-10 06:00:00	4899.69026603
1979-05-10 12:00:00	5654.06959795
1979-05-10 18:00:00	935.796559166
1979-05-11 00:00:00	106.615677051
1979-05-11 06:00:00	2816.53968827
1979-05-11 12:00:00	6288.12432557
1979-05-11 18:00:00	2022.31561484
1979-05-12 00:00:00	752.079772543
1979-05-12 06:00:00	266.117226952
1979-05-12 12:00:00	749.460122198
1979-05-12 18:00:00	74.3495084356
1979-05-13 00:00:00	24.4312583598
1979-05-13 06:00:00	74.7500364542
1979-05-13 12:00:00	383.81989063
1979-05-13 18:00:00	441.65831871
1979-05-14 00:00:00	916.006191071
1979-05-14 06:00:00	2430.56501612
1979-05-14 12:00:00	3056.45019417
1979-05-14 18:00:00	448.328912276
1979-05-15 00:00:00	124.081571697
1979-05-15 06:00:00	417.330490899
1979-05-15 12:00:00	1560.26262434
1979-05-15 18:00:00	49.7946767409
1979-05-16 00:00:00	53.3282723086
1979-05-16 06:00:00	978.796108289
1979-05-16 12:00:00	8371.27087617
1979-05-16 18:00:00	3096.30231998
1979-05-17 00:00:00	3666.42985424
1979-05-17 06:00:00	8813.75415309
1979-05-17 12:00:00	14475.4756919
1979-05-17 18:00:00	2820.32059543
1979-05-18 00:00:00	2874.74180205
1979-05-18 06:00:00	4405.68924292
1979-05-18 12:00:00	4267.05584142
1979-05-18 18:00:00	682.450018647
1979-05-19 00:00:00	796.71500106
1979-05-19 06:00:00	2870.97977908
1979-05-19 12:00:00	4648.19963195
1979-05-19 18:00:00	181.626148519
1979-05-20 00:00:00	611.479417214
1979-05-20 06:00:00	8077.52184173
1979-05-20 12:00:00	24636.9402148
1979-05-20 18:00:00	21600.9280547
1979-05-21 00:00:00	21939.3629415
1979-05-21 06:00:00	20704.8353662
1979-05-21 12:00:00	13753.8752181
1979-05-21 18:00:00	515.523568074
1979-05-22 00:00:00	3382.80502895
1979-05-22 06:00:00	3955.00993564
1979-05-22 12:00:00	1671.24315266
1979-05-22 18:00:00	90.561442026
1979-05-23 00:00:00	761.614956384
1979-05-23 06:00:00	3361.62803114
1979-05-23 12:00:00	7766.59867632
1979-05-23 18:00:00	525.369894655
1979-05-24 00:00:00	835.538841958
1979-05-24 06:00:00	165.423193762
1979-05-24 12:00:00	514.027066497
1979-05-24 18:00:00	4538.34248356
1979-05-25 00:00:00	3083.59728881
1979-05-25 06:00:00	2758.21201991
1979-05-25 12:00:00	11952.2080217
1979-05-25 18:00:00	5891.97884921
1979-05-26 00:00:00	2541.84694967
1979-05-26 06:00:00	1951.72343549
1979-05-26 12:00:00	9732.12673492
1979-05-26 18:00:00	7513.79555103
1979-05-27 00:00:00	11516.8416351
1979-05-27 06:00:00	3820.54632911
1979-05-27 12:00:00	737.164247616
1979-05-27 18:00:00	1277.02829582
1979-05-28 00:00:00	5426.86459274
1979-05-28 06:00:00	3524.37269358
1979-05-28 12:00:00	5837.14332269
1979-05-28 18:00:00	222.427769005
1979-05-29 00:00:00	1899.18040478
1979-05-29 06:00:00	6394.47955593
1979-05-29 12:00:00	8776.4084809
1979-05-29 18:00:00	283.729457405
1979-05-30 00:00:00	545.229186557
1979-05-30 06:00:00	447.937370353
1979-05-30 12:00:00	450.587051021
1979-05-30 18:00:00	774.466741779
1979-05-31 00:00:00	1637.67703868
1979-05-31 06:00:00	2181.35698085
1979-05-31 12:00:00	2505.06924242
1979-05-31 18:00:00	248.034527446
1979-06-01 00:00:00	493.026181729
1979-06-01 06:00:00	1126.47007309
1979-06-01 12:00:00	4385.02568337
1979-06-01 18:00:00	4278.60141447
1979-06-02 00:00:00	3323.66413987
1979-06-02 06:00:00	2527.66064028
1979-06-02 12:00:00	2954.36943165
1979-06-02 18:00:00	822.521151598
1979-06-03 00:00:00	1118.78465901
1979-06-03 06:00:00	4930.32020794
1979-06-03 12:00:00	13173.2920556
1979-06-03 18:00:00	10344.4600742
1979-06-04 00:00:00	9608.64621984
1979-06-04 06:00:00	10302.3855372
1979-06-04 12:00:00	9597.07435587
1979-06-04 18:00:00	4156.89962859
1979-06-05 00:00:00	1529.30434976
1979-06-05 06:00:00	558.88324044
1979-06-05 12:00:00	401.825819171
1979-06-05 18:00:00	267.182897487
1979-06-06 00:00:00	339.361463755
1979-06-06 06:00:00	74.4037905613
1979-06-06 12:00:00	255.853697471
1979-06-06 18:00:00	101.933351916
1979-06-07 00:00:00	168.44374962
1979-06-07 06:00:00	8.6688082237
1979-06-07 12:00:00	66.1091341278
1979-06-07 18:00:00	258.447354805
1979-06-08 00:00:00	84.0362256829
1979-06-08 06:00:00	445.414412638
1979-06-08 12:00:00	3084.72605214
1979-06-08 18:00:00	1219.81922774
1979-06-09 00:00:00	1147.58367058
1979-06-09 06:00:00	5555.82011457
1979-06-09 12:00:00	13354.6956973
1979-06-09 18:00:00	3908.90862561
1979-06-10 00:00:00	3163.51535831
1979-06-10 06:00:00	1181.00412247
1979-06-10 12:00:00	193.626737388
1979-06-10 18:00:00	163.356614312
1979-06-11 00:00:00	165.9396744
1979-06-11 06:00:00	760.601923152
1979-06-11 12:00:00	1264.74242313
1979-06-11 18:00:00	599.134637902
1979-06-12 00:00:00	177.772530178
1979-06-12 06:00:00	740.4024378
1979-06-12 12:00:00	1710.37629811
1979-06-12 18:00:00	374.956271882
1979-06-13 00:00:00	102.911737279
1979-06-13 06:00:00	449.07211328
1979-06-13 12:00:00	2066.57468243
1979-06-13 18:00:00	1329.09121408
1979-06-14 00:00:00	857.489598808
1979-06-14 06:00:00	6316.91462786
1979-06-14 12:00:00	14122.256797
1979-06-14 18:00:00	10030.6930549
1979-06-15 00:00:00	9837.9940899
1979-06-15 06:00:00	9647.70943132
1979-06-15 12:00:00	2756.44242954
1979-06-15 18:00:00	53.0915159414
1979-06-16 00:00:00	63.3138151373
1979-06-16 06:00:00	1595.27901414
1979-06-16 12:00:00	8723.86219362
1979-06-16 18:00:00	4777.86927733
1979-06-17 00:00:00	3016.03972841
1979-06-17 06:00:00	9274.68161255
1979-06-17 12:00:00	11708.2844455
1979-06-17 18:00:00	13025.6388521
1979-06-18 00:00:00	5165.16498776
1979-06-18 06:00:00	5064.40119563
1979-06-18 12:00:00	5663.25604049
1979-06-18 18:00:00	1630.8145629
1979-06-19 00:00:00	203.737128444
1979-06-19 06:00:00	449.430590468
1979-06-19 12:00:00	1113.42317902
1979-06-19 18:00:00	246.28626906
1979-06-20 00:00:00	1.32604990563
1979-06-20 06:00:00	6.89025123089
1979-06-20 12:00:00	100.369249339
1979-06-20 18:00:00	6.0491834792
1979-06-21 00:00:00	0.810487309275
1979-06-21 06:00:00	0.275202648397
1979-06-21 12:00:00	115.516229081
1979-06-21 18:00:00	46.8870819157
1979-06-22 00:00:00	135.489959246
1979-06-22 06:00:00	603.917074045
1979-06-22 12:00:00	1550.43684584
1979-06-22 18:00:00	1152.0188131
1979-06-23 00:00:00	136.40412147
1979-06-23 06:00:00	16.8582664552
1979-06-23 12:00:00	8.40000022258e-08
1979-06-23 18:00:00	4.94236030437
1979-06-24 00:00:00	312.544996879
1979-06-24 06:00:00	2548.22572302
1979-06-24 12:00:00	12330.6665295
1979-06-24 18:00:00	3223.18620801
1979-06-25 00:00:00	4513.18752892
1979-06-25 06:00:00	10482.7755013
1979-06-25 12:00:00	21029.1501614
1979-06-25 18:00:00	2280.51640057
1979-06-26 00:00:00	1057.59739507
1979-06-26 06:00:00	2420.45014108
1979-06-26 12:00:00	4500.98400136
1979-06-26 18:00:00	524.219508969
1979-06-27 00:00:00	397.489190983
1979-06-27 06:00:00	429.301049965
1979-06-27 12:00:00	2220.47383572
1979-06-27 18:00:00	980.23535059
1979-06-28 00:00:00	199.563597314
1979-06-28 06:00:00	252.851301856
1979-06-28 12:00:00	1998.4381387
1979-06-28 18:00:00	2318.44030967
1979-06-29 00:00:00	2751.22310433
1979-06-29 06:00:00	6475.34137182
1979-06-29 12:00:00	9616.78439373
1979-06-29 18:00:00	7969.98036979
1979-06-30 00:00:00	5678.66804331
1979-06-30 06:00:00	9997.70975954
1979-06-30 12:00:00	18943.5682335
1979-06-30 18:00:00	11962.0805875
1979-07-01 00:00:00	8190.31608124
1979-07-01 06:00:00	12008.325893
1979-07-01 12:00:00	16677.0710503
1979-07-01 18:00:00	9934.1139813
1979-07-02 00:00:00	4161.07766775
1979-07-02 06:00:00	3626.72599063
1979-07-02 12:00:00	2708.55875667
1979-07-02 18:00:00	1821.87779191
1979-07-03 00:00:00	688.529509681
1979-07-03 06:00:00	2801.79078295
1979-07-03 12:00:00	2363.41730281
1979-07-03 18:00:00	2704.33819187
1979-07-04 00:00:00	2052.91772811
1979-07-04 06:00:00	2851.78817612
1979-07-04 12:00:00	2870.62697965
1979-07-04 18:00:00	3318.59021454
1979-07-05 00:00:00	1160.36455866
1979-07-05 06:00:00	3659.09204103
1979-07-05 12:00:00	3908.7027072
1979-07-05 18:00:00	1729.24552391
1979-07-06 00:00:00	837.808996071
1979-07-06 06:00:00	3521.94170497
1979-07-06 12:00:00	10747.5683844
1979-07-06 18:00:00	4665.45368782
1979-07-07 00:00:00	1840.42230107
1979-07-07 06:00:00	5023.75620766
1979-07-07 12:00:00	13574.3665132
1979-07-07 18:00:00	7650.97056988
1979-07-08 00:00:00	8170.04522311
1979-07-08 06:00:00	16317.7594255
1979-07-08 12:00:00	35168.2383753
1979-07-08 18:00:00	16615.7461513
1979-07-09 00:00:00	6696.41209788
1979-07-09 06:00:00	10004.6677178
1979-07-09 12:00:00	21613.8727666
1979-07-09 18:00:00	17555.8947746
1979-07-10 00:00:00	13484.5808626
1979-07-10 06:00:00	12336.7413434
1979-07-10 12:00:00	20506.7871245
1979-07-10 18:00:00	10015.0388408
1979-07-11 00:00:00	3563.83696526
1979-07-11 06:00:00	4915.43927957
1979-07-11 12:00:00	3605.92098047
1979-07-11 18:00:00	893.462863947
1979-07-12 00:00:00	101.148239626
1979-07-12 06:00:00	236.055160801
1979-07-12 12:00:00	442.728354943
1979-07-12 18:00:00	564.306001031
1979-07-13 00:00:00	183.938094755
1979-07-13 06:00:00	164.169507929
1979-07-13 12:00:00	253.868034628
1979-07-13 18:00:00	644.513827277
1979-07-14 00:00:00	228.822080759
1979-07-14 06:00:00	1168.88650999
1979-07-14 12:00:00	3317.13168789
1979-07-14 18:00:00	1494.88881515
1979-07-15 00:00:00	1153.31462537
1979-07-15 06:00:00	1220.04101492
1979-07-15 12:00:00	7115.64240384
1979-07-15 18:00:00	7355.02694604
1979-07-16 00:00:00	5011.29817033
1979-07-16 06:00:00	7331.08877136
1979-07-16 12:00:00	17334.8198404
1979-07-16 18:00:00	4214.31935536
1979-07-17 00:00:00	1067.61375586
1979-07-17 06:00:00	360.227425975
1979-07-17 12:00:00	2485.91747589
1979-07-17 18:00:00	403.135438395
1979-07-18 00:00:00	888.777261946
1979-07-18 06:00:00	5301.16625425
1979-07-18 12:00:00	15556.4459824
1979-07-18 18:00:00	5952.89283172
1979-07-19 00:00:00	4805.66517902
1979-07-19 06:00:00	10784.0980322
1979-07-19 12:00:00	27635.1604551
1979-07-19 18:00:00	15925.8630813
1979-07-20 00:00:00	10634.6964247
1979-07-20 06:00:00	16038.7277232
1979-07-20 12:00:00	23641.9824236
1979-07-20 18:00:00	9162.60104578
1979-07-21 00:00:00	3887.0164575
1979-07-21 06:00:00	5185.97934267
1979-07-21 12:00:00	19960.1451287
1979-07-21 18:00:00	10792.6470268
1979-07-22 00:00:00	6105.53114697
1979-07-22 06:00:00	11263.1271975
1979-07-22 12:00:00	26876.5197983
1979-07-22 18:00:00	15533.0064976
1979-07-23 00:00:00	11575.9662585
1979-07-23 06:00:00	13521.7149448
1979-07-23 12:00:00	18533.2721583
1979-07-23 18:00:00	5111.31269247
1979-07-24 00:00:00	2255.41876956
1979-07-24 06:00:00	2761.19271824
1979-07-24 12:00:00	7815.08444933
1979-07-24 18:00:00	4647.19543917
1979-07-25 00:00:00	2261.51118983
1979-07-25 06:00:00	1776.66381662
1979-07-25 12:00:00	2832.21719699
1979-07-25 18:00:00	136.134925906
1979-07-26 00:00:00	28.8360681478
1979-07-26 06:00:00	146.512508317
1979-07-26 12:00:00	1315.41643805
1979-07-26 18:00:00	214.425445145
1979-07-27 00:00:00	53.3815071482
1979-07-27 06:00:00	108.918491784
1979-07-27 12:00:00	1247.59164721
1979-07-27 18:00:00	18.7061354163
1979-07-28 00:00:00	5.6484962808
1979-07-28 06:00:00	3.5157607559
1979-07-28 12:00:00	21.3654631592
1979-07-28 18:00:00	2.65332339202
1979-07-29 00:00:00	316.221847671
1979-07-29 06:00:00	1123.38083503
1979-07-29 12:00:00	3446.69130262
1979-07-29 18:00:00	371.671223183
1979-07-30 00:00:00	1107.72831483
1979-07-30 06:00:00	9676.3484177
1979-07-30 12:00:00	10911.6474538
1979-07-30 18:00:00	878.5566473
1979-07-31 00:00:00	524.729062921
1979-07-31 06:00:00	1732.18020414
1979-07-31 12:00:00	6002.08196419
1979-07-31 18:00:00	2603.9333715
1979-08-01 00:00:00	4105.25970558
1979-08-01 06:00:00	5234.88925298
1979-08-01 12:00:00	12530.9960335
1979-08-01 18:00:00	8528.16905388
1979-08-02 00:00:00	9479.12485598
1979-08-02 06:00:00	10598.2381342
1979-08-02 12:00:00	27915.780363
1979-08-02 18:00:00	9206.0382045
1979-08-03 00:00:00	3188.02019448
1979-08-03 06:00:00	2046.39550981
1979-08-03 12:00:00	2331.82624008
1979-08-03 18:00:00	305.331789336
1979-08-04 00:00:00	421.940117136
1979-08-04 06:00:00	469.463892079
1979-08-04 12:00:00	2821.32167863
1979-08-04 18:00:00	1165.56580965
1979-08-05 00:00:00	530.169361827
1979-08-05 06:00:00	278.328627274
1979-08-05 12:00:00	363.096993777
1979-08-05 18:00:00	17.3880092781
1979-08-06 00:00:00	97.0140254217
1979-08-06 06:00:00	660.438514312
1979-08-06 12:00:00	375.316029296
1979-08-06 18:00:00	302.425365879
1979-08-07 00:00:00	773.311482889
1979-08-07 06:00:00	731.42918967
1979-08-07 12:00:00	735.463804167
1979-08-07 18:00:00	430.090239972
1979-08-08 00:00:00	1326.35513154
1979-08-08 06:00:00	1216.01151406
1979-08-08 12:00:00	5381.70354854
1979-08-08 18:00:00	4488.99287992
1979-08-09 00:00:00	2643.8832148
1979-08-09 06:00:00	1190.80065674
1979-08-09 12:00:00	5751.17458786
1979-08-09 18:00:00	5470.86782465
1979-08-10 00:00:00	7962.6526391
1979-08-10 06:00:00	12069.9060044
1979-08-10 12:00:00	21089.4205467
1979-08-10 18:00:00	11403.6741604
1979-08-11 00:00:00	4299.90521473
1979-08-11 06:00:00	2483.78460243
1979-08-11 12:00:00	1582.58957437
1979-08-11 18:00:00	358.312436215
1979-08-12 00:00:00	129.527680008
1979-08-12 06:00:00	31.7791847413
1979-08-12 12:00:00	5.34832014877
1979-08-12 18:00:00	0.0
1979-08-13 00:00:00	76.779152737
1979-08-13 06:00:00	434.736016869
1979-08-13 12:00:00	647.913498131
1979-08-13 18:00:00	127.813482266
1979-08-14 00:00:00	732.799367272
1979-08-14 06:00:00	5246.08747395
1979-08-14 12:00:00	14780.5435891
1979-08-14 18:00:00	6035.75628971
1979-08-15 00:00:00	4471.02212597
1979-08-15 06:00:00	4181.18340751
1979-08-15 12:00:00	2571.59546294
1979-08-15 18:00:00	77.3081453712
1979-08-16 00:00:00	135.432487777
1979-08-16 06:00:00	1398.2025237
1979-08-16 12:00:00	3592.96499299
1979-08-16 18:00:00	612.27550335
1979-08-17 00:00:00	388.060911373
1979-08-17 06:00:00	896.37214138
1979-08-17 12:00:00	2413.58946831
1979-08-17 18:00:00	1352.33217762
1979-08-18 00:00:00	414.964327445
1979-08-18 06:00:00	249.056993369
1979-08-18 12:00:00	2898.70367894
1979-08-18 18:00:00	1176.20373511
1979-08-19 00:00:00	256.861601126
1979-08-19 06:00:00	255.204517992
1979-08-19 12:00:00	163.913251746
1979-08-19 18:00:00	88.3791262678
1979-08-20 00:00:00	182.424798858
1979-08-20 06:00:00	178.591581179
1979-08-20 12:00:00	868.418764544
1979-08-20 18:00:00	898.789870168
1979-08-21 00:00:00	1135.26225711
1979-08-21 06:00:00	4264.59093262
1979-08-21 12:00:00	15114.5896462
1979-08-21 18:00:00	3728.46261558
1979-08-22 00:00:00	2787.18206993
1979-08-22 06:00:00	2940.44531049
1979-08-22 12:00:00	5792.8548466
1979-08-22 18:00:00	1154.13834667
1979-08-23 00:00:00	1373.7204573
1979-08-23 06:00:00	2113.12509856
1979-08-23 12:00:00	2727.88888009
1979-08-23 18:00:00	292.275963862
1979-08-24 00:00:00	883.244004345
1979-08-24 06:00:00	2364.78495054
1979-08-24 12:00:00	3250.45246588
1979-08-24 18:00:00	225.382014482
1979-08-25 00:00:00	224.342406212
1979-08-25 06:00:00	439.107353396
1979-08-25 12:00:00	980.634473223
1979-08-25 18:00:00	80.1552914485
1979-08-26 00:00:00	138.150380121
1979-08-26 06:00:00	403.322907951
1979-08-26 12:00:00	1776.04731016
1979-08-26 18:00:00	4890.03118657
1979-08-27 00:00:00	9366.08454783
1979-08-27 06:00:00	13988.7004011
1979-08-27 12:00:00	32015.4834107
1979-08-27 18:00:00	18906.5913849
1979-08-28 00:00:00	16270.223112
1979-08-28 06:00:00	15774.3607208
1979-08-28 12:00:00	26338.3290341
1979-08-28 18:00:00	11245.8288766
1979-08-29 00:00:00	5727.80365893
1979-08-29 06:00:00	3129.3836383
1979-08-29 12:00:00	3372.96927974
1979-08-29 18:00:00	186.386181756
1979-08-30 00:00:00	47.9825691597
1979-08-30 06:00:00	57.3965539114
1979-08-30 12:00:00	162.313269133
1979-08-30 18:00:00	5.56678426658
1979-08-31 00:00:00	8.00470553971
1979-08-31 06:00:00	29.1604891634
1979-08-31 12:00:00	7.05718855294
1979-08-31 18:00:00	0.340528738686
1979-09-01 00:00:00	0.0466248908495
1979-09-01 06:00:00	23.8707407813
1979-09-01 12:00:00	76.8484783275
1979-09-01 18:00:00	28.9278444883
1979-09-02 00:00:00	158.558889373
1979-09-02 06:00:00	1044.17016319
1979-09-02 12:00:00	2723.18640022
1979-09-02 18:00:00	1288.26553771
1979-09-03 00:00:00	1161.64147451
1979-09-03 06:00:00	3276.01882559
1979-09-03 12:00:00	11115.9764197
1979-09-03 18:00:00	2987.05688881
1979-09-04 00:00:00	5523.27424046
1979-09-04 06:00:00	4524.73847852
1979-09-04 12:00:00	8343.17113344
1979-09-04 18:00:00	1887.89065915
1979-09-05 00:00:00	903.812077741
1979-09-05 06:00:00	221.178537797
1979-09-05 12:00:00	268.890125285
1979-09-05 18:00:00	43.9966260678
1979-09-06 00:00:00	705.542192601
1979-09-06 06:00:00	1990.02940775
1979-09-06 12:00:00	3849.65236599
1979-09-06 18:00:00	2826.47600023
1979-09-07 00:00:00	1839.02401461
1979-09-07 06:00:00	439.712492596
1979-09-07 12:00:00	91.096300833
1979-09-07 18:00:00	72.3916051215
1979-09-08 00:00:00	74.0107849032
1979-09-08 06:00:00	8.01879805004
1979-09-08 12:00:00	11.3332291445
1979-09-08 18:00:00	1.43222792507
1979-09-09 00:00:00	0.419601206556
1979-09-09 06:00:00	6.54255612542
1979-09-09 12:00:00	229.576008265
1979-09-09 18:00:00	487.777347742
1979-09-10 00:00:00	171.232270428
1979-09-10 06:00:00	118.096798774
1979-09-10 12:00:00	2010.54475688
1979-09-10 18:00:00	2431.0983942
1979-09-11 00:00:00	3752.8456357
1979-09-11 06:00:00	7519.41646325
1979-09-11 12:00:00	21231.2193656
1979-09-11 18:00:00	10194.4236703
1979-09-12 00:00:00	4067.20286492
1979-09-12 06:00:00	981.596440898
1979-09-12 12:00:00	1011.33368954
1979-09-12 18:00:00	1681.51906876
1979-09-13 00:00:00	5110.0695001
1979-09-13 06:00:00	14369.2338477
1979-09-13 12:00:00	23267.2980538
1979-09-13 18:00:00	8899.23491153
1979-09-14 00:00:00	4288.90499161
1979-09-14 06:00:00	3825.48552686
1979-09-14 12:00:00	13795.8553517
1979-09-14 18:00:00	13996.2012401
1979-09-15 00:00:00	19294.9050116
1979-09-15 06:00:00	22190.4618683
1979-09-15 12:00:00	37133.5874146
1979-09-15 18:00:00	12367.0693814
1979-09-16 00:00:00	3458.94849987
1979-09-16 06:00:00	1368.32616704
1979-09-16 12:00:00	6304.87493491
1979-09-16 18:00:00	4894.8793519
1979-09-17 00:00:00	7402.30423128
1979-09-17 06:00:00	11813.9644509
1979-09-17 12:00:00	21002.1685706
1979-09-17 18:00:00	8829.01720978
1979-09-18 00:00:00	13600.7266973
1979-09-18 06:00:00	24145.2792384
1979-09-18 12:00:00	41559.6450462
1979-09-18 18:00:00	22201.6519763
1979-09-19 00:00:00	9566.49668191
1979-09-19 06:00:00	7812.29491259
1979-09-19 12:00:00	20445.2277781
1979-09-19 18:00:00	1087.27656513
1979-09-20 00:00:00	1149.60500611
1979-09-20 06:00:00	7577.01668627
1979-09-20 12:00:00	22375.8769042
1979-09-20 18:00:00	6330.21281025
1979-09-21 00:00:00	12111.1536416
1979-09-21 06:00:00	9221.40650646
1979-09-21 12:00:00	8682.74185504
1979-09-21 18:00:00	1140.80826437
1979-09-22 00:00:00	277.043377424
1979-09-22 06:00:00	1295.6596638
1979-09-22 12:00:00	7312.45021979
1979-09-22 18:00:00	2382.49553442
1979-09-23 00:00:00	531.102063136
1979-09-23 06:00:00	256.053118275
1979-09-23 12:00:00	1852.5186757
1979-09-23 18:00:00	1912.10939493
1979-09-24 00:00:00	902.704878423
1979-09-24 06:00:00	1117.85056707
1979-09-24 12:00:00	1434.36349214
1979-09-24 18:00:00	477.157225693
1979-09-25 00:00:00	215.859815048
1979-09-25 06:00:00	616.768206546
1979-09-25 12:00:00	3319.55656696
1979-09-25 18:00:00	3243.17952628
1979-09-26 00:00:00	5055.45278585
1979-09-26 06:00:00	7500.78355441
1979-09-26 12:00:00	13675.0641753
1979-09-26 18:00:00	5355.26036817
1979-09-27 00:00:00	9525.68650406
1979-09-27 06:00:00	10389.6109459
1979-09-27 12:00:00	8413.79052385
1979-09-27 18:00:00	2323.54928243
1979-09-28 00:00:00	459.260392535
1979-09-28 06:00:00	470.170823204
1979-09-28 12:00:00	478.276915293
1979-09-28 18:00:00	251.987736959
1979-09-29 00:00:00	271.670978919
1979-09-29 06:00:00	790.743336584
1979-09-29 12:00:00	1564.76717085
1979-09-29 18:00:00	362.050839693
1979-09-30 00:00:00	79.9997872524
1979-09-30 06:00:00	51.1827382293
1979-09-30 12:00:00	424.97932741
1979-09-30 18:00:00	605.637672848
1979-10-01 00:00:00	1176.78956774
1979-10-01 06:00:00	2848.08609685
1979-10-01 12:00:00	5836.05156172
1979-10-01 18:00:00	4549.92147977
1979-10-02 00:00:00	5643.77297794
1979-10-02 06:00:00	7011.26828546
1979-10-02 12:00:00	15590.0195209
1979-10-02 18:00:00	9290.16435394
1979-10-03 00:00:00	9954.61911441
1979-10-03 06:00:00	9820.7173539
1979-10-03 12:00:00	13962.6035924
1979-10-03 18:00:00	6080.67759592
1979-10-04 00:00:00	3946.52570189
1979-10-04 06:00:00	3301.8875476
1979-10-04 12:00:00	3468.58626387
1979-10-04 18:00:00	3391.16886421
1979-10-05 00:00:00	6441.48543137
1979-10-05 06:00:00	10787.9961304
1979-10-05 12:00:00	15389.048627
1979-10-05 18:00:00	15399.6212012
1979-10-06 00:00:00	14775.4922671
1979-10-06 06:00:00	11953.7035252
1979-10-06 12:00:00	14592.711537
1979-10-06 18:00:00	10474.9460772
1979-10-07 00:00:00	7935.93528451
1979-10-07 06:00:00	6021.10030735
1979-10-07 12:00:00	4328.67201591
1979-10-07 18:00:00	445.053341038
1979-10-08 00:00:00	62.6401610289
1979-10-08 06:00:00	62.0642809245
1979-10-08 12:00:00	107.290309635
1979-10-08 18:00:00	313.005737757
1979-10-09 00:00:00	1063.43336923
1979-10-09 06:00:00	1735.64019402
1979-10-09 12:00:00	1778.49048062
1979-10-09 18:00:00	683.953706886
1979-10-10 00:00:00	273.551330283
1979-10-10 06:00:00	379.280168963
1979-10-10 12:00:00	2613.59959981
1979-10-10 18:00:00	2745.58049747
1979-10-11 00:00:00	4046.63097011
1979-10-11 06:00:00	1579.20648605
1979-10-11 12:00:00	278.23569405
1979-10-11 18:00:00	8.50590588433
1979-10-12 00:00:00	78.8071525382
1979-10-12 06:00:00	330.387344466
1979-10-12 12:00:00	4770.23611576
1979-10-12 18:00:00	102.058798404
1979-10-13 00:00:00	9.84387465992
1979-10-13 06:00:00	79.0737550749
1979-10-13 12:00:00	552.433346972
1979-10-13 18:00:00	806.288480508
1979-10-14 00:00:00	1396.91980646
1979-10-14 06:00:00	4261.66023269
1979-10-14 12:00:00	15537.9659092
1979-10-14 18:00:00	4625.25297783
1979-10-15 00:00:00	625.516651103
1979-10-15 06:00:00	536.474935298
1979-10-15 12:00:00	2794.37181995
1979-10-15 18:00:00	1830.62846815
1979-10-16 00:00:00	3173.88751669
1979-10-16 06:00:00	2888.37923561
1979-10-16 12:00:00	1992.91966375
1979-10-16 18:00:00	835.745203215
1979-10-17 00:00:00	1992.22676537
1979-10-17 06:00:00	2014.26420293
1979-10-17 12:00:00	1655.88558524
1979-10-17 18:00:00	2591.64223273
1979-10-18 00:00:00	4672.61257663
1979-10-18 06:00:00	11232.6413138
1979-10-18 12:00:00	34431.6159694
1979-10-18 18:00:00	26662.3015417
1979-10-19 00:00:00	12608.4629217
1979-10-19 06:00:00	5862.75915708
1979-10-19 12:00:00	10465.3607279
1979-10-19 18:00:00	7310.99236024
1979-10-20 00:00:00	9076.27583388
1979-10-20 06:00:00	4409.07510164
1979-10-20 12:00:00	6679.81082571
1979-10-20 18:00:00	1923.6488772
1979-10-21 00:00:00	1756.29902489
1979-10-21 06:00:00	1410.0998221
1979-10-21 12:00:00	4185.62125681
1979-10-21 18:00:00	4003.58550589
1979-10-22 00:00:00	1963.16376401
1979-10-22 06:00:00	2906.86014694
1979-10-22 12:00:00	9695.03084374
1979-10-22 18:00:00	4854.77818912
1979-10-23 00:00:00	6382.97827133
1979-10-23 06:00:00	7112.17558949
1979-10-23 12:00:00	16215.606074
1979-10-23 18:00:00	11615.4389539
1979-10-24 00:00:00	9160.99902594
1979-10-24 06:00:00	8273.65176536
1979-10-24 12:00:00	14614.5351994
1979-10-24 18:00:00	12079.1343435
1979-10-25 00:00:00	12864.5083464
1979-10-25 06:00:00	16289.756315
1979-10-25 12:00:00	30361.2098855
1979-10-25 18:00:00	23010.0071367
1979-10-26 00:00:00	20981.2213667
1979-10-26 06:00:00	21720.402568
1979-10-26 12:00:00	30755.5348389
1979-10-26 18:00:00	21388.129248
1979-10-27 00:00:00	15921.5511261
1979-10-27 06:00:00	13099.2463264
1979-10-27 12:00:00	18061.6770148
1979-10-27 18:00:00	14094.3573439
1979-10-28 00:00:00	9466.72906635
1979-10-28 06:00:00	9221.20556807
1979-10-28 12:00:00	15516.1644286
1979-10-28 18:00:00	13524.4172303
1979-10-29 00:00:00	10311.2722032
1979-10-29 06:00:00	10155.7919493
1979-10-29 12:00:00	8082.63272138
1979-10-29 18:00:00	3199.22125313
1979-10-30 00:00:00	1638.91886039
1979-10-30 06:00:00	1985.57201153
1979-10-30 12:00:00	1389.53591664
1979-10-30 18:00:00	1443.70071296
1979-10-31 00:00:00	3891.3070818
1979-10-31 06:00:00	5943.86543672
1979-10-31 12:00:00	11692.3065417
1979-10-31 18:00:00	10058.7811798
1979-11-01 00:00:00	3733.47632805
1979-11-01 06:00:00	1294.1696466
1979-11-01 12:00:00	5187.57275261
1979-11-01 18:00:00	2174.56873995
1979-11-02 00:00:00	1997.43493768
1979-11-02 06:00:00	1958.06513464
1979-11-02 12:00:00	4952.9067352
1979-11-02 18:00:00	1475.90319783
1979-11-03 00:00:00	36.810797139
1979-11-03 06:00:00	511.02761928
1979-11-03 12:00:00	3365.45553945
1979-11-03 18:00:00	6825.26434583
1979-11-04 00:00:00	16042.9534917
1979-11-04 06:00:00	23013.3058882
1979-11-04 12:00:00	30255.7427409
1979-11-04 18:00:00	26484.6466668
1979-11-05 00:00:00	17919.3223256
1979-11-05 06:00:00	9757.85039666
1979-11-05 12:00:00	21254.0090194
1979-11-05 18:00:00	13141.7273644
1979-11-06 00:00:00	17025.402161
1979-11-06 06:00:00	19840.330201
1979-11-06 12:00:00	30816.6492971
1979-11-06 18:00:00	35403.0142786
1979-11-07 00:00:00	19116.2875923
1979-11-07 06:00:00	8981.34737592
1979-11-07 12:00:00	19096.6545005
1979-11-07 18:00:00	3608.92038799
1979-11-08 00:00:00	11706.9745597
1979-11-08 06:00:00	22984.6384472
1979-11-08 12:00:00	24247.6425576
1979-11-08 18:00:00	5543.75699723
1979-11-09 00:00:00	6361.73614478
1979-11-09 06:00:00	6977.09400308
1979-11-09 12:00:00	21058.8688572
1979-11-09 18:00:00	7572.5718647
1979-11-10 00:00:00	4645.8728107
1979-11-10 06:00:00	2866.47977432
1979-11-10 12:00:00	6244.42570867
1979-11-10 18:00:00	3528.74185802
1979-11-11 00:00:00	3745.92481464
1979-11-11 06:00:00	7658.32758865
1979-11-11 12:00:00	14125.9457476
1979-11-11 18:00:00	8226.59447294
1979-11-12 00:00:00	14960.3607055
1979-11-12 06:00:00	26803.1030688
1979-11-12 12:00:00	26481.6156699
1979-11-12 18:00:00	10307.3200196
1979-11-13 00:00:00	3719.42453334
1979-11-13 06:00:00	3229.5384089
1979-11-13 12:00:00	5334.15443544
1979-11-13 18:00:00	1772.54516785
1979-11-14 00:00:00	442.729091484
1979-11-14 06:00:00	881.405140951
1979-11-14 12:00:00	5948.93293282
1979-11-14 18:00:00	8075.34205694
1979-11-15 00:00:00	5920.52241963
1979-11-15 06:00:00	4370.53602397
1979-11-15 12:00:00	3786.25888842
1979-11-15 18:00:00	3129.86985232
1979-11-16 00:00:00	3136.482126
1979-11-16 06:00:00	1047.24709259
1979-11-16 12:00:00	4879.78970129
1979-11-16 18:00:00	7994.04392059
1979-11-17 00:00:00	6050.21066405
1979-11-17 06:00:00	1266.5452389
1979-11-17 12:00:00	4074.33438521
1979-11-17 18:00:00	4326.77696446
1979-11-18 00:00:00	8509.15874148
1979-11-18 06:00:00	9713.71070424
1979-11-18 12:00:00	9713.49149903
1979-11-18 18:00:00	1606.41632075
1979-11-19 00:00:00	747.908877768
1979-11-19 06:00:00	269.6069923
1979-11-19 12:00:00	194.760486993
1979-11-19 18:00:00	11.9071416051
1979-11-20 00:00:00	120.390796568
1979-11-20 06:00:00	549.86722846
1979-11-20 12:00:00	2612.28207797
1979-11-20 18:00:00	2196.78398921
1979-11-21 00:00:00	1569.96303613
1979-11-21 06:00:00	1144.9188722
1979-11-21 12:00:00	1028.09211074
1979-11-21 18:00:00	4.5384177791
1979-11-22 00:00:00	658.998153773
1979-11-22 06:00:00	2260.06397224
1979-11-22 12:00:00	4031.49332989
1979-11-22 18:00:00	4499.68026147
1979-11-23 00:00:00	5877.94646372
1979-11-23 06:00:00	5586.62921592
1979-11-23 12:00:00	6923.01600165
1979-11-23 18:00:00	6678.95119053
1979-11-24 00:00:00	7373.97233764
1979-11-24 06:00:00	4450.46348759
1979-11-24 12:00:00	4615.38864048
1979-11-24 18:00:00	3418.86188029
1979-11-25 00:00:00	5016.23875632
1979-11-25 06:00:00	6204.74691555
1979-11-25 12:00:00	13406.4212997
1979-11-25 18:00:00	16354.5207105
1979-11-26 00:00:00	23112.2356824
1979-11-26 06:00:00	27526.9783688
1979-11-26 12:00:00	36679.1017079
1979-11-26 18:00:00	43982.563899
1979-11-27 00:00:00	21386.5453438
1979-11-27 06:00:00	14462.6496275
1979-11-27 12:00:00	10689.1457321
1979-11-27 18:00:00	1648.099254
1979-11-28 00:00:00	1951.9583731
1979-11-28 06:00:00	5118.73775658
1979-11-28 12:00:00	7913.08966815
1979-11-28 18:00:00	7506.76159807
1979-11-29 00:00:00	11249.707106
1979-11-29 06:00:00	9694.1269381
1979-11-29 12:00:00	14634.9247189
1979-11-29 18:00:00	13696.7799775
1979-11-30 00:00:00	5905.35388686
1979-11-30 06:00:00	9372.70448088
1979-11-30 12:00:00	18054.1458643
1979-11-30 18:00:00	19422.9100282
1979-12-01 00:00:00	32593.1518948
1979-12-01 06:00:00	41092.3947965
1979-12-01 12:00:00	45871.7774807
1979-12-01 18:00:00	21247.4041456
1979-12-02 00:00:00	13679.9856994
1979-12-02 06:00:00	14104.8131091
1979-12-02 12:00:00	28726.6983539
1979-12-02 18:00:00	15641.9182117
1979-12-03 00:00:00	19357.7451046
1979-12-03 06:00:00	23957.4255244
1979-12-03 12:00:00	24721.8206569
1979-12-03 18:00:00	7918.22211827
1979-12-04 00:00:00	13319.6606205
1979-12-04 06:00:00	29109.0630133
1979-12-04 12:00:00	11073.7745356
1979-12-04 18:00:00	10975.0868786
1979-12-05 00:00:00	23795.9981756
1979-12-05 06:00:00	35653.0679704
1979-12-05 12:00:00	44682.6581378
1979-12-05 18:00:00	41787.3315006
1979-12-06 00:00:00	17536.223603
1979-12-06 06:00:00	7332.35481296
1979-12-06 12:00:00	10825.6471303
1979-12-06 18:00:00	6421.06301462
1979-12-07 00:00:00	6451.83531296
1979-12-07 06:00:00	7642.35720411
1979-12-07 12:00:00	6322.71673315
1979-12-07 18:00:00	1382.26557815
1979-12-08 00:00:00	1996.88172148
1979-12-08 06:00:00	6799.95997257
1979-12-08 12:00:00	13647.0328076
1979-12-08 18:00:00	5637.65123842
1979-12-09 00:00:00	4122.18829874
1979-12-09 06:00:00	2541.68028401
1979-12-09 12:00:00	8323.49635642
1979-12-09 18:00:00	17321.9399422
1979-12-10 00:00:00	30829.6557305
1979-12-10 06:00:00	47300.8357418
1979-12-10 12:00:00	37342.6008208
1979-12-10 18:00:00	34260.8387188
1979-12-11 00:00:00	15531.6931788
1979-12-11 06:00:00	16773.4447636
1979-12-11 12:00:00	25560.5464282
1979-12-11 18:00:00	31644.8489149
1979-12-12 00:00:00	22358.2581345
1979-12-12 06:00:00	4721.64546662
1979-12-12 12:00:00	1276.8611386
1979-12-12 18:00:00	533.510345583
1979-12-13 00:00:00	4113.76025523
1979-12-13 06:00:00	9464.21195186
1979-12-13 12:00:00	15472.0845699
1979-12-13 18:00:00	5796.85262091
1979-12-14 00:00:00	5424.17150667
1979-12-14 06:00:00	20123.784645
1979-12-14 12:00:00	33836.8474841
1979-12-14 18:00:00	22178.3884826
1979-12-15 00:00:00	13029.5215968
1979-12-15 06:00:00	20625.1127839
1979-12-15 12:00:00	31634.0698691
1979-12-15 18:00:00	29396.1472875
1979-12-16 00:00:00	29920.3761782
1979-12-16 06:00:00	32865.2547153
1979-12-16 12:00:00	30894.0278098
1979-12-16 18:00:00	12326.7039034
1979-12-17 00:00:00	9227.72063491
1979-12-17 06:00:00	35293.5778128
1979-12-17 12:00:00	38616.2162572
1979-12-17 18:00:00	40022.1943818
1979-12-18 00:00:00	42487.7770249
1979-12-18 06:00:00	47129.0064114
1979-12-18 12:00:00	43778.0602169
1979-12-18 18:00:00	10385.1172169
1979-12-19 00:00:00	2079.33680147
1979-12-19 06:00:00	1319.21817503
1979-12-19 12:00:00	3017.31780307
1979-12-19 18:00:00	3425.66290096
1979-12-20 00:00:00	2996.50506185
1979-12-20 06:00:00	2922.85178357
1979-12-20 12:00:00	2109.84858168
1979-12-20 18:00:00	3605.66884514
1979-12-21 00:00:00	3661.63966961
1979-12-21 06:00:00	2842.36162062
1979-12-21 12:00:00	5966.61743713
1979-12-21 18:00:00	5931.63494897
1979-12-22 00:00:00	11011.9323828
1979-12-22 06:00:00	16625.4794251
1979-12-22 12:00:00	22900.2135946
1979-12-22 18:00:00	12421.7998996
1979-12-23 00:00:00	7570.80655792
1979-12-23 06:00:00	2551.13889758
1979-12-23 12:00:00	7030.14899676
1979-12-23 18:00:00	7599.20355606
1979-12-24 00:00:00	6522.5197606
1979-12-24 06:00:00	3639.26977642
1979-12-24 12:00:00	2556.0590146
1979-12-24 18:00:00	533.011709543
1979-12-25 00:00:00	507.04272716
1979-12-25 06:00:00	253.374814852
1979-12-25 12:00:00	1314.09823152
1979-12-25 18:00:00	478.587286927
1979-12-26 00:00:00	580.290465482
1979-12-26 06:00:00	1979.11566992
1979-12-26 12:00:00	4525.39613557
1979-12-26 18:00:00	4466.20411484
1979-12-27 00:00:00	6105.89737668
1979-12-27 06:00:00	8006.40619643
1979-12-27 12:00:00	23375.3470335
1979-12-27 18:00:00	26911.6610268
1979-12-28 00:00:00	26190.3201591
1979-12-28 06:00:00	26876.5986295
1979-12-28 12:00:00	23749.7335717
1979-12-28 18:00:00	20279.5441559
1979-12-29 00:00:00	23521.1130707
1979-12-29 06:00:00	10967.4771068
1979-12-29 12:00:00	20182.1980446
1979-12-29 18:00:00	11660.5191302
1979-12-30 00:00:00	11631.8998114
1979-12-30 06:00:00	3672.35550957
1979-12-30 12:00:00	8730.87609349
1979-12-30 18:00:00	5941.37025248
1979-12-31 00:00:00	6523.97562257
1979-12-31 06:00:00	4219.60257338
1979-12-31 12:00:00	11182.6446794
1979-12-31 18:00:00	8438.19448747
1980-01-01 00:00:00	10007.7633307
1980-01-01 06:00:00	8882.93827417
1980-01-01 12:00:00	9766.14847381
1980-01-01 18:00:00	4892.87684944
1980-01-02 00:00:00	4421.00334529
1980-01-02 06:00:00	5038.94439255
1980-01-02 12:00:00	6275.14902626
1980-01-02 18:00:00	2166.63402502
1980-01-03 00:00:00	812.942397567
1980-01-03 06:00:00	1032.72918569
1980-01-03 12:00:00	2108.59566439
1980-01-03 18:00:00	2567.96627219
1980-01-04 00:00:00	4366.75306242
1980-01-04 06:00:00	8092.22032621
1980-01-04 12:00:00	15961.4099913
1980-01-04 18:00:00	11883.1303878
1980-01-05 00:00:00	4229.61540497
1980-01-05 06:00:00	1744.72341564
1980-01-05 12:00:00	3434.86281388
1980-01-05 18:00:00	3232.66463208
1980-01-06 00:00:00	3512.27219163
1980-01-06 06:00:00	2050.67614583
1980-01-06 12:00:00	1836.68655066
1980-01-06 18:00:00	1635.94370643
1980-01-07 00:00:00	1940.91452778
1980-01-07 06:00:00	3646.48348778
1980-01-07 12:00:00	3966.36729581
1980-01-07 18:00:00	2275.16298689
1980-01-08 00:00:00	1232.37765695
1980-01-08 06:00:00	901.755885106
1980-01-08 12:00:00	715.798370453
1980-01-08 18:00:00	1129.16036514
1980-01-09 00:00:00	564.602463597
1980-01-09 06:00:00	567.717860872
1980-01-09 12:00:00	1013.69007107
1980-01-09 18:00:00	789.956673833
1980-01-10 00:00:00	372.60603204
1980-01-10 06:00:00	413.402525462
1980-01-10 12:00:00	582.394286627
1980-01-10 18:00:00	915.245186702
1980-01-11 00:00:00	546.167112933
1980-01-11 06:00:00	741.161504214
1980-01-11 12:00:00	883.661904716
1980-01-11 18:00:00	588.20221933
1980-01-12 00:00:00	396.975437574
1980-01-12 06:00:00	1165.09275988
1980-01-12 12:00:00	2311.87312278
1980-01-12 18:00:00	2296.83056747
1980-01-13 00:00:00	893.366826376
1980-01-13 06:00:00	604.364213171
1980-01-13 12:00:00	419.674611222
1980-01-13 18:00:00	938.678786738
1980-01-14 00:00:00	2303.67246051
1980-01-14 06:00:00	4083.97918865
1980-01-14 12:00:00	6084.30214422
1980-01-14 18:00:00	2249.45364015
1980-01-15 00:00:00	1526.01432602
1980-01-15 06:00:00	758.192474847
1980-01-15 12:00:00	273.803389315
1980-01-15 18:00:00	193.233396592
1980-01-16 00:00:00	308.839322493
1980-01-16 06:00:00	800.271069674
1980-01-16 12:00:00	2168.39160089
1980-01-16 18:00:00	1113.75556279
1980-01-17 00:00:00	446.539105967
1980-01-17 06:00:00	422.773401458
1980-01-17 12:00:00	657.5751613
1980-01-17 18:00:00	231.593645467
1980-01-18 00:00:00	90.6634358033
1980-01-18 06:00:00	270.694501431
1980-01-18 12:00:00	1446.90130151
1980-01-18 18:00:00	3188.93252234
1980-01-19 00:00:00	2289.78633849
1980-01-19 06:00:00	1863.47197505
1980-01-19 12:00:00	1431.19029347
1980-01-19 18:00:00	3566.71224011
1980-01-20 00:00:00	4264.52429581
1980-01-20 06:00:00	4541.00695455
1980-01-20 12:00:00	3774.40888182
1980-01-20 18:00:00	2078.01916795
1980-01-21 00:00:00	2169.70519421
1980-01-21 06:00:00	4173.89259582
1980-01-21 12:00:00	16155.8842162
1980-01-21 18:00:00	26780.4361666
1980-01-22 00:00:00	27998.5060467
1980-01-22 06:00:00	19956.2393613
1980-01-22 12:00:00	23241.9240753
1980-01-22 18:00:00	10873.6526165
1980-01-23 00:00:00	6499.34744145
1980-01-23 06:00:00	6432.45543454
1980-01-23 12:00:00	11693.6189175
1980-01-23 18:00:00	3433.79995186
1980-01-24 00:00:00	2454.44125162
1980-01-24 06:00:00	1550.81400226
1980-01-24 12:00:00	927.234339882
1980-01-24 18:00:00	241.62728936
1980-01-25 00:00:00	194.505376765
1980-01-25 06:00:00	826.369374385
1980-01-25 12:00:00	3662.70209131
1980-01-25 18:00:00	3321.1952893
1980-01-26 00:00:00	1110.78509406
1980-01-26 06:00:00	2518.74154845
1980-01-26 12:00:00	4689.36233531
1980-01-26 18:00:00	4590.01532796
1980-01-27 00:00:00	9750.53503271
1980-01-27 06:00:00	14810.7320836
1980-01-27 12:00:00	9545.29791305
1980-01-27 18:00:00	725.857393381
1980-01-28 00:00:00	1395.25566598
1980-01-28 06:00:00	3940.84074225
1980-01-28 12:00:00	5038.02369898
1980-01-28 18:00:00	2895.90713362
1980-01-29 00:00:00	541.708807305
1980-01-29 06:00:00	397.306518844
1980-01-29 12:00:00	1516.47528179
1980-01-29 18:00:00	2693.55511117
1980-01-30 00:00:00	4592.08201199
1980-01-30 06:00:00	15996.282494
1980-01-30 12:00:00	43408.3445977
1980-01-30 18:00:00	39367.7934922
1980-01-31 00:00:00	20414.6132082
1980-01-31 06:00:00	5732.5878075
1980-01-31 12:00:00	21052.867595
1980-01-31 18:00:00	28402.5635984
1980-02-01 00:00:00	29991.5963577
1980-02-01 06:00:00	26830.6338985
1980-02-01 12:00:00	17265.3699589
1980-02-01 18:00:00	5383.43213068
1980-02-02 00:00:00	12344.2952912
1980-02-02 06:00:00	4366.70108388
1980-02-02 12:00:00	13639.2833654
1980-02-02 18:00:00	18581.094548
1980-02-03 00:00:00	17733.7502665
1980-02-03 06:00:00	10072.915568
1980-02-03 12:00:00	6665.71187412
1980-02-03 18:00:00	7327.728534
1980-02-04 00:00:00	18832.4788268
1980-02-04 06:00:00	21308.7774717
1980-02-04 12:00:00	7497.30184201
1980-02-04 18:00:00	2829.48812511
1980-02-05 00:00:00	11158.1922917
1980-02-05 06:00:00	26425.3299849
1980-02-05 12:00:00	22605.05775
1980-02-05 18:00:00	19708.7289594
1980-02-06 00:00:00	15683.638784
1980-02-06 06:00:00	12333.8618709
1980-02-06 12:00:00	11028.2611031
1980-02-06 18:00:00	5333.0145983
1980-02-07 00:00:00	4729.06695238
1980-02-07 06:00:00	4877.00064546
1980-02-07 12:00:00	5463.57320902
1980-02-07 18:00:00	3002.00520497
1980-02-08 00:00:00	3341.92033067
1980-02-08 06:00:00	1580.82285187
1980-02-08 12:00:00	2536.69124289
1980-02-08 18:00:00	2362.1698941
1980-02-09 00:00:00	2440.99778279
1980-02-09 06:00:00	1887.16185133
1980-02-09 12:00:00	5970.54545259
1980-02-09 18:00:00	2120.98228306
1980-02-10 00:00:00	2408.01874083
1980-02-10 06:00:00	2849.1973854
1980-02-10 12:00:00	6753.04336639
1980-02-10 18:00:00	6538.53317419
1980-02-11 00:00:00	4862.0118745
1980-02-11 06:00:00	3539.84882261
1980-02-11 12:00:00	6518.18272543
1980-02-11 18:00:00	1692.13635569
1980-02-12 00:00:00	1473.05182503
1980-02-12 06:00:00	420.499826035
1980-02-12 12:00:00	1334.37614478
1980-02-12 18:00:00	7.25156178226
1980-02-13 00:00:00	651.948837834
1980-02-13 06:00:00	1002.93174484
1980-02-13 12:00:00	1699.32106588
1980-02-13 18:00:00	680.093851969
1980-02-14 00:00:00	591.300052875
1980-02-14 06:00:00	289.36213672
1980-02-14 12:00:00	834.630774544
1980-02-14 18:00:00	485.155736863
1980-02-15 00:00:00	2378.07248428
1980-02-15 06:00:00	3680.17678165
1980-02-15 12:00:00	5328.14039493
1980-02-15 18:00:00	1394.64445541
1980-02-16 00:00:00	272.394167835
1980-02-16 06:00:00	91.4187775718
1980-02-16 12:00:00	305.658803641
1980-02-16 18:00:00	53.9024256263
1980-02-17 00:00:00	67.1156886933
1980-02-17 06:00:00	22.413146914
1980-02-17 12:00:00	131.622794498
1980-02-17 18:00:00	47.3259360493
1980-02-18 00:00:00	289.448464973
1980-02-18 06:00:00	763.907776211
1980-02-18 12:00:00	1280.619251
1980-02-18 18:00:00	2020.33457432
1980-02-19 00:00:00	3314.22622533
1980-02-19 06:00:00	3988.82915417
1980-02-19 12:00:00	7616.30119188
1980-02-19 18:00:00	5495.46915832
1980-02-20 00:00:00	4203.22726527
1980-02-20 06:00:00	5634.53340461
1980-02-20 12:00:00	7925.77276773
1980-02-20 18:00:00	5335.14217472
1980-02-21 00:00:00	3193.72427932
1980-02-21 06:00:00	2449.73074762
1980-02-21 12:00:00	3280.52637986
1980-02-21 18:00:00	3497.54113564
1980-02-22 00:00:00	2873.31263336
1980-02-22 06:00:00	3553.58368409
1980-02-22 12:00:00	3791.41450781
1980-02-22 18:00:00	3187.61136706
1980-02-23 00:00:00	1874.97067801
1980-02-23 06:00:00	1204.85563353
1980-02-23 12:00:00	880.123261371
1980-02-23 18:00:00	1212.84081544
1980-02-24 00:00:00	575.432045028
1980-02-24 06:00:00	1664.87056083
1980-02-24 12:00:00	1791.09212693
1980-02-24 18:00:00	2289.7949303
1980-02-25 00:00:00	678.656206903
1980-02-25 06:00:00	681.84865597
1980-02-25 12:00:00	182.318824933
1980-02-25 18:00:00	64.5733804344
1980-02-26 00:00:00	0.0902910841487
1980-02-26 06:00:00	0.345472066084
1980-02-26 12:00:00	87.1751099166
1980-02-26 18:00:00	57.7385802288
1980-02-27 00:00:00	102.184062797
1980-02-27 06:00:00	260.872067902
1980-02-27 12:00:00	101.045486635
1980-02-27 18:00:00	138.639220687
1980-02-28 00:00:00	127.622850808
1980-02-28 06:00:00	325.410258088
1980-02-28 12:00:00	1284.16771778
1980-02-28 18:00:00	2117.43024507
1980-02-29 00:00:00	8360.99181686
1980-02-29 06:00:00	8026.60955214
1980-02-29 12:00:00	8715.92374826
1980-02-29 18:00:00	4755.6759647
1980-03-01 00:00:00	12196.2458695
1980-03-01 06:00:00	27850.723499
1980-03-01 12:00:00	33042.9304932
1980-03-01 18:00:00	20898.9873372
1980-03-02 00:00:00	12511.4884617
1980-03-02 06:00:00	13148.7398109
1980-03-02 12:00:00	30203.2661992
1980-03-02 18:00:00	27316.8395902
1980-03-03 00:00:00	19405.5644888
1980-03-03 06:00:00	9800.40041233
1980-03-03 12:00:00	19595.0049639
1980-03-03 18:00:00	9456.42705999
1980-03-04 00:00:00	8354.50250108
1980-03-04 06:00:00	1841.36437293
1980-03-04 12:00:00	3565.76519726
1980-03-04 18:00:00	43.7339119829
1980-03-05 00:00:00	112.914810942
1980-03-05 06:00:00	1909.81738218
1980-03-05 12:00:00	2986.26933768
1980-03-05 18:00:00	4508.80479989
1980-03-06 00:00:00	5143.82102831
1980-03-06 06:00:00	6117.87929418
1980-03-06 12:00:00	20754.0278964
1980-03-06 18:00:00	12551.1333123
1980-03-07 00:00:00	15999.7991524
1980-03-07 06:00:00	12591.8582429
1980-03-07 12:00:00	11839.365934
1980-03-07 18:00:00	1837.61235397
1980-03-08 00:00:00	2667.90903036
1980-03-08 06:00:00	1205.47007778
1980-03-08 12:00:00	344.814480469
1980-03-08 18:00:00	448.643321068
1980-03-09 00:00:00	80.2217799439
1980-03-09 06:00:00	273.607511235
1980-03-09 12:00:00	1211.83006368
1980-03-09 18:00:00	79.2715729491
1980-03-10 00:00:00	17.5755180388
1980-03-10 06:00:00	14.2669087196
1980-03-10 12:00:00	284.421351254
1980-03-10 18:00:00	654.965201521
1980-03-11 00:00:00	1534.64799082
1980-03-11 06:00:00	2398.91342311
1980-03-11 12:00:00	887.626500325
1980-03-11 18:00:00	183.43372565
1980-03-12 00:00:00	780.001146704
1980-03-12 06:00:00	1871.07384368
1980-03-12 12:00:00	6138.69949237
1980-03-12 18:00:00	8119.97567533
1980-03-13 00:00:00	11715.0754614
1980-03-13 06:00:00	11330.2114687
1980-03-13 12:00:00	13011.1679224
1980-03-13 18:00:00	8170.81608215
1980-03-14 00:00:00	8011.30028569
1980-03-14 06:00:00	10274.5369429
1980-03-14 12:00:00	17655.66305
1980-03-14 18:00:00	9037.43680173
1980-03-15 00:00:00	6359.29209264
1980-03-15 06:00:00	5357.13699803
1980-03-15 12:00:00	7693.7855763
1980-03-15 18:00:00	4194.06857127
1980-03-16 00:00:00	1011.79901598
1980-03-16 06:00:00	2945.184831
1980-03-16 12:00:00	1604.92714782
1980-03-16 18:00:00	1919.90997152
1980-03-17 00:00:00	459.205677167
1980-03-17 06:00:00	1695.52443462
1980-03-17 12:00:00	3963.35918278
1980-03-17 18:00:00	4687.55685692
1980-03-18 00:00:00	6254.74770249
1980-03-18 06:00:00	13673.7368139
1980-03-18 12:00:00	21991.8933688
1980-03-18 18:00:00	24483.7775881
1980-03-19 00:00:00	20920.8091765
1980-03-19 06:00:00	22634.8614961
1980-03-19 12:00:00	32600.386616
1980-03-19 18:00:00	19525.6592802
1980-03-20 00:00:00	13694.5586994
1980-03-20 06:00:00	12962.9352679
1980-03-20 12:00:00	18437.388489
1980-03-20 18:00:00	7923.19854164
1980-03-21 00:00:00	6679.33047834
1980-03-21 06:00:00	8745.68549751
1980-03-21 12:00:00	18499.334054
1980-03-21 18:00:00	12518.4958544
1980-03-22 00:00:00	15365.6290875
1980-03-22 06:00:00	16319.6092928
1980-03-22 12:00:00	14818.3167451
1980-03-22 18:00:00	3684.74621888
1980-03-23 00:00:00	2273.96915044
1980-03-23 06:00:00	2126.08822439
1980-03-23 12:00:00	4158.11802426
1980-03-23 18:00:00	3721.3173313
1980-03-24 00:00:00	3030.97884568
1980-03-24 06:00:00	3828.80145838
1980-03-24 12:00:00	5011.38628623
1980-03-24 18:00:00	4295.11030505
1980-03-25 00:00:00	3595.50017545
1980-03-25 06:00:00	4823.83519826
1980-03-25 12:00:00	6289.32691903
1980-03-25 18:00:00	5093.84141936
1980-03-26 00:00:00	4243.72474793
1980-03-26 06:00:00	2933.25577478
1980-03-26 12:00:00	1771.09239207
1980-03-26 18:00:00	1267.49142911
1980-03-27 00:00:00	2970.42598345
1980-03-27 06:00:00	6695.89097566
1980-03-27 12:00:00	12515.827418
1980-03-27 18:00:00	5842.58216226
1980-03-28 00:00:00	6286.03567154
1980-03-28 06:00:00	4115.02042775
1980-03-28 12:00:00	9955.04772218
1980-03-28 18:00:00	3263.32963387
1980-03-29 00:00:00	18064.738781
1980-03-29 06:00:00	18299.0787109
1980-03-29 12:00:00	37793.54451
1980-03-29 18:00:00	29485.7906145
1980-03-30 00:00:00	28118.6400603
1980-03-30 06:00:00	27695.4589845
1980-03-30 12:00:00	34689.7366601
1980-03-30 18:00:00	13781.9647041
1980-03-31 00:00:00	9779.11849902
1980-03-31 06:00:00	4724.40382666
1980-03-31 12:00:00	7566.4895535
1980-03-31 18:00:00	224.00367875
1980-04-01 00:00:00	1849.66975309
1980-04-01 06:00:00	4117.07443998
1980-04-01 12:00:00	4161.06929391
1980-04-01 18:00:00	1911.00519337
1980-04-02 00:00:00	7063.61527161
1980-04-02 06:00:00	25631.914242
1980-04-02 12:00:00	40588.7403167
1980-04-02 18:00:00	35743.6251002
1980-04-03 00:00:00	30973.8171092
1980-04-03 06:00:00	26156.1356138
1980-04-03 12:00:00	36138.2035015
1980-04-03 18:00:00	13760.9269528
1980-04-04 00:00:00	7893.65618018
1980-04-04 06:00:00	6052.14383614
1980-04-04 12:00:00	9622.73586301
1980-04-04 18:00:00	2079.05263083
1980-04-05 00:00:00	509.374137489
1980-04-05 06:00:00	604.304998524
1980-04-05 12:00:00	7517.50233508
1980-04-05 18:00:00	1910.9954269
1980-04-06 00:00:00	142.828350047
1980-04-06 06:00:00	127.155587778
1980-04-06 12:00:00	1165.01845253
1980-04-06 18:00:00	61.3198546497
1980-04-07 00:00:00	5.64208955005
1980-04-07 06:00:00	1077.49044955
1980-04-07 12:00:00	2884.10297614
1980-04-07 18:00:00	4067.9767395
1980-04-08 00:00:00	5409.91033217
1980-04-08 06:00:00	8333.45139154
1980-04-08 12:00:00	23531.4195726
1980-04-08 18:00:00	9183.70666898
1980-04-09 00:00:00	5076.20856956
1980-04-09 06:00:00	5630.734539
1980-04-09 12:00:00	10126.1149755
1980-04-09 18:00:00	4079.22165771
1980-04-10 00:00:00	2906.1706803
1980-04-10 06:00:00	3787.80397069
1980-04-10 12:00:00	10083.7110329
1980-04-10 18:00:00	3273.67573801
1980-04-11 00:00:00	2214.41206239
1980-04-11 06:00:00	2295.41116581
1980-04-11 12:00:00	4103.77333518
1980-04-11 18:00:00	181.896096605
1980-04-12 00:00:00	63.0881924653
1980-04-12 06:00:00	65.9058249727
1980-04-12 12:00:00	655.902481885
1980-04-12 18:00:00	528.1481211
1980-04-13 00:00:00	2606.78800573
1980-04-13 06:00:00	3337.82201228
1980-04-13 12:00:00	3546.62139427
1980-04-13 18:00:00	984.441042005
1980-04-14 00:00:00	1200.26529224
1980-04-14 06:00:00	738.156610331
1980-04-14 12:00:00	321.956195116
1980-04-14 18:00:00	93.4167899754
1980-04-15 00:00:00	448.401581548
1980-04-15 06:00:00	333.625407252
1980-04-15 12:00:00	686.325656931
1980-04-15 18:00:00	444.84019909
1980-04-16 00:00:00	390.231635091
1980-04-16 06:00:00	211.238430484
1980-04-16 12:00:00	176.932343684
1980-04-16 18:00:00	36.3073501564
1980-04-17 00:00:00	19.6650625677
1980-04-17 06:00:00	271.491984727
1980-04-17 12:00:00	3213.95291282
1980-04-17 18:00:00	7582.35279636
1980-04-18 00:00:00	6505.455389
1980-04-18 06:00:00	10244.484767
1980-04-18 12:00:00	26398.0802226
1980-04-18 18:00:00	16749.6534607
1980-04-19 00:00:00	30951.2378453
1980-04-19 06:00:00	39096.3156415
1980-04-19 12:00:00	44941.6565483
1980-04-19 18:00:00	42593.9316242
1980-04-20 00:00:00	36597.9088196
1980-04-20 06:00:00	16874.9630226
1980-04-20 12:00:00	10094.5238993
1980-04-20 18:00:00	4040.31677982
1980-04-21 00:00:00	1392.89493201
1980-04-21 06:00:00	1376.61071443
1980-04-21 12:00:00	2630.13278345
1980-04-21 18:00:00	3124.48792354
1980-04-22 00:00:00	319.09883224
1980-04-22 06:00:00	169.828490224
1980-04-22 12:00:00	2505.06884061
1980-04-22 18:00:00	1139.58805633
1980-04-23 00:00:00	2149.37791937
1980-04-23 06:00:00	6407.64688593
1980-04-23 12:00:00	17514.7860674
1980-04-23 18:00:00	15938.7766742
1980-04-24 00:00:00	10592.1609707
1980-04-24 06:00:00	12981.6243744
1980-04-24 12:00:00	23043.1727665
1980-04-24 18:00:00	18073.1252192
1980-04-25 00:00:00	7930.30070004
1980-04-25 06:00:00	2801.71175552
1980-04-25 12:00:00	1636.43982191
1980-04-25 18:00:00	2423.98265825
1980-04-26 00:00:00	1460.43766084
1980-04-26 06:00:00	3304.13372111
1980-04-26 12:00:00	5063.31730859
1980-04-26 18:00:00	969.318101895
1980-04-27 00:00:00	167.452339375
1980-04-27 06:00:00	292.448904896
1980-04-27 12:00:00	2480.53471985
1980-04-27 18:00:00	3138.83384901
1980-04-28 00:00:00	1947.81731842
1980-04-28 06:00:00	1392.59443293
1980-04-28 12:00:00	2114.55166471
1980-04-28 18:00:00	819.186087812
1980-04-29 00:00:00	252.646010753
1980-04-29 06:00:00	364.750571573
1980-04-29 12:00:00	228.445593041
1980-04-29 18:00:00	398.264496981
1980-04-30 00:00:00	609.391282314
1980-04-30 06:00:00	406.561064998
1980-04-30 12:00:00	1675.35402507
1980-04-30 18:00:00	1259.47029935
1980-05-01 00:00:00	963.710320558
1980-05-01 06:00:00	3916.89352578
1980-05-01 12:00:00	13808.4799653
1980-05-01 18:00:00	13598.9079423
1980-05-02 00:00:00	9279.00637362
1980-05-02 06:00:00	15199.8550566
1980-05-02 12:00:00	22432.9929693
1980-05-02 18:00:00	13091.885223
1980-05-03 00:00:00	6982.45919239
1980-05-03 06:00:00	9920.23159344
1980-05-03 12:00:00	12485.4255664
1980-05-03 18:00:00	4786.03854668
1980-05-04 00:00:00	2082.21863501
1980-05-04 06:00:00	1256.13544756
1980-05-04 12:00:00	7328.36052529
1980-05-04 18:00:00	5050.90702595
1980-05-05 00:00:00	1262.60644574
1980-05-05 06:00:00	1123.83343897
1980-05-05 12:00:00	2621.89561732
1980-05-05 18:00:00	657.324659709
1980-05-06 00:00:00	213.927311523
1980-05-06 06:00:00	905.180164552
1980-05-06 12:00:00	3164.4481099
1980-05-06 18:00:00	1946.65143263
1980-05-07 00:00:00	1813.29134568
1980-05-07 06:00:00	1033.98992851
1980-05-07 12:00:00	1092.98203593
1980-05-07 18:00:00	144.491157772
1980-05-08 00:00:00	645.689132929
1980-05-08 06:00:00	2698.30955008
1980-05-08 12:00:00	4463.66552536
1980-05-08 18:00:00	5075.25820916
1980-05-09 00:00:00	4629.06142282
1980-05-09 06:00:00	7599.07535984
1980-05-09 12:00:00	7947.29029077
1980-05-09 18:00:00	1629.56489474
1980-05-10 00:00:00	128.960424745
1980-05-10 06:00:00	151.817956104
1980-05-10 12:00:00	1072.07594618
1980-05-10 18:00:00	268.691174929
1980-05-11 00:00:00	328.736678286
1980-05-11 06:00:00	951.49753585
1980-05-11 12:00:00	3963.4662071
1980-05-11 18:00:00	2540.63235329
1980-05-12 00:00:00	3171.78014908
1980-05-12 06:00:00	6003.7817002
1980-05-12 12:00:00	9492.70734934
1980-05-12 18:00:00	9316.95413686
1980-05-13 00:00:00	6763.66143272
1980-05-13 06:00:00	12968.726214
1980-05-13 12:00:00	27461.0981641
1980-05-13 18:00:00	19437.2475386
1980-05-14 00:00:00	14004.4962245
1980-05-14 06:00:00	10525.2004973
1980-05-14 12:00:00	14756.7595466
1980-05-14 18:00:00	8408.86114103
[truncated: 109,041 more rows]
